# Supplementary material for: Impact of serum SP-A and SP-D levels on comparison and prognosis of idiopathic pulmonary fibrosis: A systematic review and meta-analysis
Source: PubMed Central journal article supplement — Medicine (Baltimore). 2017 Jun 8;96(23):e7083. doi: 10.1097/MD.0000000000007083 (PMC5466227; doi:10.1097/md.0000000000007083), 2017-06-08
Supplement: medi-96-e7083-s001.pdf [file medi-96-e7083-s001.pdf]

Supplementary Table 2 5-year survival rate from SP-A/D Kaplan-Meier Curves

| Author    | Cut-off     | High | Middle | Low  |
|-----------|-------------|------|--------|------|
| SP-A      |             |      |        |      |
| Hamai     | 53          | 0.57 |        | 0.37 |
| JW.Song   | 80.3        | 0.45 |        | 0.46 |
| TAKAHASHI | 83.5        | 0.68 |        | 0.57 |
| Greene*   | 69/93/130   | 0.48 | 0.42   | 0.35 |
| SP-D      |             |      |        |      |
| Hamai     | 225         | 0.62 |        | 0.32 |
| Barlo     | 460         | 0.51 |        | 0.18 |
| TAKAHASHI | 253         | 0.71 |        | 0.42 |
| Greene*   | 291/392/571 | 0.52 | 0.45   | 0.35 |

\*: the estimated 5-yr survival percentages for a group of 64-yr-old never-smokers at the 25th, 50th, and 75th percentiles.

Supplementary Table 1 Quality Assessment for all studies

|                      |         | Hama<br>i | Gree<br>ne | Papai<br>oann | Song | TAK<br>AHA | Barlo | Colla<br>rd | song<br>lei | lu<br>wei | KUR<br>OKI | KU<br>WA | Oka<br>moto | Okud<br>a | Kaku<br>gawa | Doub<br>ková | Hond<br>a | Hond<br>a2 | Kenn<br>edy | Möll<br>eken | OHN<br>ISHI | white |
|----------------------|---------|-----------|------------|---------------|------|------------|-------|-------------|-------------|-----------|------------|----------|-------------|-----------|--------------|--------------|-----------|------------|-------------|--------------|-------------|-------|
| Selection<br>(A-D)   | A       | ☆         | ☆          | ☆             | ☆    | ☆          | ☆     | ☆           | ☆           | ☆         | ☆          | ☆        | ☆           | ☆         | ☆            | ☆            | ☆         | ☆          | ☆           | ☆            | ☆           | ☆     |
|                      | B       | ☆         | ☆          | ☆             | ☆    | ☆          | ☆     | ☆           | ☆           | ☆         | ☆          | ☆        | ☆           | ☆         | ☆            | ☆            | ☆         | ☆          | ☆           | ☆            | ☆           | ☆     |
|                      | C       | ☆         | ☆          |               |      |            | ☆     |             | ☆           | ☆         | ☆          | ☆        |             | ☆         |              | ☆            |           |            |             | ☆            | ☆           | ☆     |
|                      | D       | ☆         | ☆          | ☆             | ☆    | ☆          | ☆     | ☆           | ☆           | ☆         | ☆          | ☆        | ☆           | ☆         | ☆            | ☆            | ☆         | ☆          | ☆           | ☆            | ☆           | ☆     |
| Comparability<br>(E) | E       | ☆         | ☆          | ☆             | ☆☆   | ☆☆         | ☆     | ☆           | ☆           | ☆         | ☆          | ☆        | ☆           | ☆         | ☆☆           | ☆            | ☆         | ☆          | ☆           | ☆            | ☆           | ☆     |
|                      | F       |           |            |               |      |            |       |             |             |           |            |          |             |           |              |              |           |            |             |              |             |       |
| Exposure<br>(F-H)    | G       | ☆         | ☆          | ☆             |      |            | ☆     | ☆           | ☆           | ☆         | ☆          | ☆        | ☆           | ☆         |              | ☆            | ☆         | ☆          | ☆           | ☆            |             | ☆     |
|                      | H       |           |            |               |      |            |       |             |             |           |            |          |             |           |              |              |           |            |             |              |             |       |
|                      | summary | 6         | 6          | 5             | 5    | 5          | 6     | 5           | 6           | 6         | 6          | 6        | 5           | 6         | 5            | 6            | 5         | 5          | 6           | 6            | 5           | 6     |

\*Note: A study can be awarded a maximum of one star for each numbered item within the Selection and Exposure categories. A maximum of two stars can be given for Comparability. When total stars of one study were more than 5 can be included in the meta-analysis.

A: Is the case definition adequate? B: Representativeness of the cases. C: Selection of Controls. D: Definition of Controls.

E: Comparability of cases and controls on the basis of the design or analysis.

F: Ascertainment of exposure. G: Same method of ascertainment for cases and controls. H: Non-Response rate
